# Supplementary material for: Evaluation of Electrochemical Stability of Sulfonated Anthraquinone-Based Acidic Electrolyte for Redox Flow Battery Application
Source: MDPI journal article supplement (doi:10.3390/molecules26092484), 2021-04-24
Supplement: s1 [file s1]

## Supplementary Materials to

Article

# Evaluation of Electrochemical Stability of Sulfonated Anthraquinone-Based Acidic Electrolyte for Redox Flow Battery Application

Petr Mazúr <sup>1,2,\*</sup>, Jiří Charvát <sup>1</sup>, Jindřich Mrlík <sup>1</sup>, Jaromír Pociďč <sup>2</sup>, Jiří Akrman <sup>3</sup>, Lubomír Kubáč <sup>3</sup>, Barbora Řeháková <sup>4</sup> and Juraj Kosek <sup>1,2</sup>

<sup>1</sup> University of Chemistry and Technology, Prague, Technická 5, 166 28 Praha 6, Czech Republic; [mazurp@vscht.cz](mailto:mazurp@vscht.cz) (P.M.); [charvatj@vscht.cz](mailto:charvatj@vscht.cz) (J.C.); [mrlikj@vscht.cz](mailto:mrlikj@vscht.cz) (J.M.); [jkk@vscht.cz](mailto:jkk@vscht.cz) (J.K.)

<sup>2</sup> New Technologies—Research Centre, University of West Bohemia, Univerzitní 8, 306 14 Plzeň, Czech Republic; [pocidicj@ntc.zcu.cz](mailto:pocidicj@ntc.zcu.cz) (J.P.)

<sup>3</sup> Centre for Organic Chemistry, Rybitví 296, 533 54 Rybitví, Czech Republic; [jiri.akrman@cocltd.cz](mailto:jiri.akrman@cocltd.cz) (J.A.); [lubomir.kubac@cocltd.cz](mailto:lubomir.kubac@cocltd.cz) (L.K.)

<sup>4</sup> Synthesia, a.s., Semtín 103, 530 02 Pardubice, Czech Republic; [Barbora.Rehakova@synthesia.cz](mailto:Barbora.Rehakova@synthesia.cz) (B.Ř.)

\* Correspondence: [mazurp@vscht.cz](mailto:mazurp@vscht.cz)

## List of content

Figure S1: HPLC chromatogram of anthraquinone sulfonation mixture after synthesis.

Figure S2: UV-vis spectrum of initial electrolyte and electrolyte after electrochemical test, both samples diluted 50 000 times by demineralized water, measured in cuvette with the optical length of 1 cm.

Figure S3: Equivalent circuit used for evaluation of EIS spectra of RFB full-cell consisting of: R1 – ohmic resistance of the cell, R2 and R3 – charge transfer resistance of both electrodes, Q2 and Q3 – constant phase elements representing electrode-electrolyte interface on both interfaces.

Table S1: Composition of the AQDS negolyte before and after electrochemical test in the redox flow battery obtained by HPLC

Table S2: Composition of AQDS electrolyte after 5 days in different SOC and temperatures

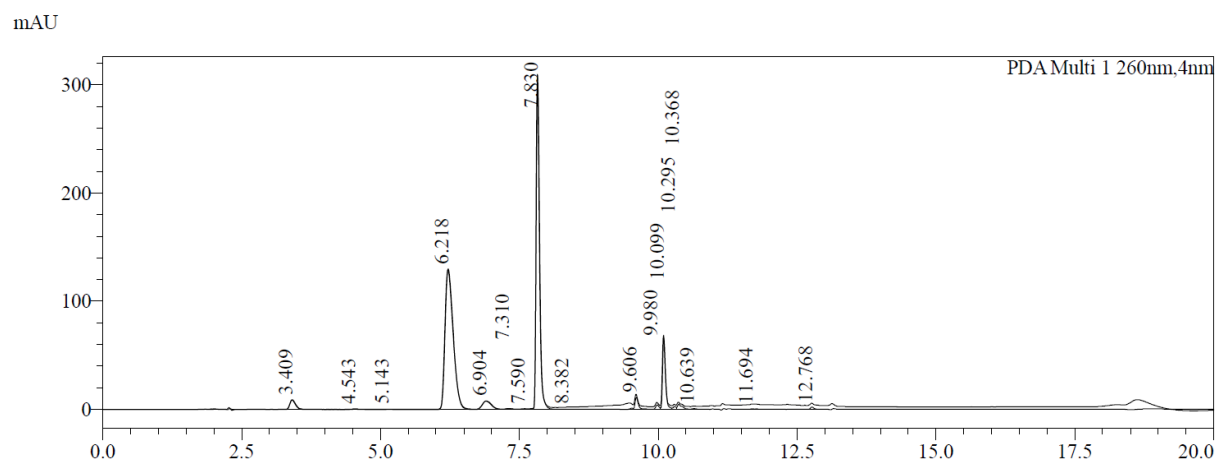

Figure S1: HPLC chromatogram of anthraquinone sulfonation mixture after synthesis.

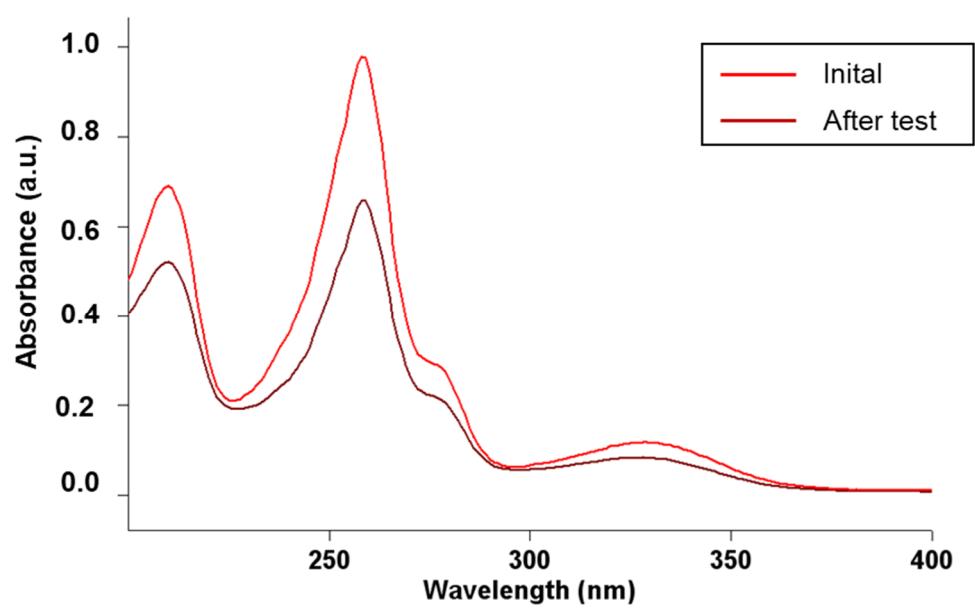

Figure S2: UV-vis spectrum of initial electrolyte and electrolyte after electrochemical test, both samples diluted 50 000 times by demineralized water, measured in cuvette with the optical length of 1 cm.

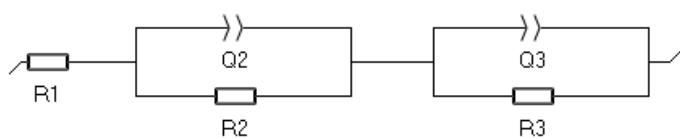

Figure S3: Equivalent circuit used for evaluation of EIS spectra of RFB full-cell consisting of: R1 – ohmic resistance of the cell, R2 and R3 – charge transfer resistance of both electrodes, Q2 and Q3 – constant phase elements representing electrode-electrolyte interface on both interfaces.

Table S1: Composition of the AQDS negolyte before and after electrochemical test in the redox flow battery obtained by HPLC

| Compound                               | Retention<br>time | Initial<br>electrolyte | Electrolyte<br>after test |
|----------------------------------------|-------------------|------------------------|---------------------------|
|                                        | (min)             | (area %)               | (area %)                  |
| anthraquinone-1,7-disulfonic acid      | 3.4               | 2.1                    | 2.0                       |
| anthraquinone-2,6-disulfonic acid      | 6.2               | 41.9                   | 44.1                      |
| anthraquinone-1,6-disulfonic acid      | 6.9               | 2.8                    | 3.0                       |
| unknown compound - 1                   | 7.3               | 0.2                    | 0.3                       |
| anthraquinone-2,7-disulfonic acid      | 7.8               | 41.0                   | 43.0                      |
| unknown compound - 2                   | 9                 | 0.0                    | 0.4                       |
| unknown compound - 3                   | 9.4               | 0.0                    | 0.3                       |
| anthraquinone-1-sulfonic acid          | 9.6               | 1.5                    | 0.3                       |
| 2-hydroxyanthraquinone-1-sulfonic acid | 10.0              | 0.6                    | 0.2                       |
| anthraquinone-2-sulfonic acid          | 10.1              | 7.7                    | 3.2                       |
| unknown compound - 4                   | 10.4              | 0.8                    | 0.8                       |

Table S2: Composition of AQDS electrolyte after 5 days in different SOC and temperatures

| SoC / %                                                                | 0                                      | 0     | 25    | 50    | 50    | 75    | 75    | 85    | 95    | 100   | 100   |
|------------------------------------------------------------------------|----------------------------------------|-------|-------|-------|-------|-------|-------|-------|-------|-------|-------|
| Temperature / °C                                                       | 20                                     | 60    | 60    | 20    | 60    | 20    | 60    | 60    | 60    | 20    | 60    |
| c AQDS <sup>(1)</sup> / mol dm <sup>-3</sup>                           | 0.84                                   | 0.85  | 0.82  | 0.81  | 0.81  | 0.80  | 0.72  | 0.68  | 0.68  | 0.79  | 0.65  |
| c H <sub>2</sub> SO <sub>4</sub> <sup>(2)</sup> / mol dm <sup>-3</sup> | 1.14                                   | 1.36  | 1.03  | 1.04  | 1.09  | 1.06  | 1.27  | 1.31  | 1.17  | 1.02  | 1.16  |
| c total sulphate / mol dm <sup>-3</sup>                                | 2.82                                   | 3.06  | 2.67  | 2.66  | 2.71  | 2.66  | 2.71  | 2.67  | 2.53  | 2.60  | 2.46  |
|                                                                        | <b>Content <sup>(3)</sup> / Area %</b> |       |       |       |       |       |       |       |       |       |       |
| anthraquinon-1,7-disulfonic acid                                       | 1.80                                   | 1.83  | 1.80  | 1.78  | 1.40  | 1.79  | 1.34  | 1.28  | 1.31  | 1.83  | 1.29  |
| anthraquinon-2,6-disulfonic acid                                       | 39.15                                  | 39.30 | 41.28 | 39.20 | 40.11 | 39.54 | 41.70 | 42.14 | 43.95 | 41.49 | 43.96 |
| anthraquinon-1,6-disulfonic acid                                       | 1.91                                   | 1.97  | 2.66  | 2.37  | 2.14  | 2.06  | 1.73  | 1.92  | 1.69  | 2.06  | 2.06  |
| anthraquinon-2,7-disulfonic acid                                       | 43.37                                  | 43.22 | 42.49 | 42.85 | 43.39 | 43.00 | 44.10 | 44.73 | 45.66 | 44.67 | 45.85 |
| anthraquinon-1-sulfonic acid                                           | 2.06                                   | 2.07  | 1.55  | 2.06  | 1.44  | 1.97  | 0.76  | 0.62  | 0.50  | 1.14  | 0.55  |
| anthraquinon-2-sulfonic acid                                           | 11.72                                  | 11.61 | 10.22 | 11.74 | 11.53 | 11.65 | 10.38 | 9.31  | 6.90  | 8.82  | 6.30  |
| 2,6-AQDS / 2,7-AQDS / area % ratio                                     | 0.90                                   | 0.91  | 0.97  | 0.91  | 0.92  | 0.92  | 0.95  | 0.94  | 0.96  | 0.93  | 0.96  |
| 2,6- and 2,7-AQDS / area % ratio                                       | 0.83                                   | 0.83  | 0.84  | 0.82  | 0.83  | 0.83  | 0.86  | 0.87  | 0.90  | 0.86  | 0.90  |

<sup>(1)</sup>UV-vis spectrophotometry, <sup>(2)</sup>acido-basic titration by NaOH, <sup>(3)</sup>HPLC
